# Supplementary material
Source: publisher figshare collection journal article supplement (https://gsajournals.figshare.com/ndownloader/files/28970862)
Supplement: Supplementary file 1 [file 28970862]

## Sheet: Normal family 84xB
XX female x XY male
(1) Data collected from Williamson and May 2005
(2) deduced from the observed genotypes of the offspring (as Y-Y+ male cross with a XX female cannot produce XX females)
(3) outliers not fiting with the model. Potentially sex phenotyping errors, human errors during genotyping or PCR contaminations
	Pheno.	Genotypic	Genotypic	Genotypic	Genotypic	"Apparent"	"Apparent"	"Apparent"	Sex
Fish ID	Sex	Sex	Sex	Sex	Sex	SNP	SNP	SNP	Genotype
(1)	(1)	OtY1 (1)	GH-pseudo (1)	OtY2 (1)	sdY	Exon 2	Intron 2	Exon 3
Female #84					F	No sdY	No sdY	No sdY	XX
Male B					M	G/A	T/C	failed	XY+ (2)
84X B #46	F	F	F	F	F	No sdY	No sdY	No sdY	XX
84X B #47	F	F	F	F	F	No sdY	No sdY	No sdY	XX
84X B #56	F	F	F	F	F	No sdY	No sdY	No sdY	XX
84X B #66	F	F	F	F	F	No sdY	No sdY	No sdY	XX
84X B #74	F	F	F	F	F	No sdY	No sdY	No sdY	XX
84X B #76	F	F	F	F	F	No sdY	No sdY	No sdY	XX
84X B #79	F	F	F	F	F	No sdY	No sdY	No sdY	XX
84X B #80	F	F	F	F	F	No sdY	No sdY	No sdY	XX
84X B #72	F	F	F	F	F	No sdY	No sdY	No sdY	XX
84X B #51	F	F	F	F	F	No sdY	No sdY	No sdY	XX
84X B #53	F	F	F	F	F	No sdY	No sdY	No sdY	XX
84X B #54	F	F	F	F	F	No sdY	No sdY	No sdY	XX
84X B #60	F	F	F	F	F	No sdY	No sdY	No sdY	XX
84X B #67	F	F	F	F	F	No sdY	No sdY	No sdY	XX
84X B #78	F	F	F	F	F	No sdY	No sdY	No sdY	XX
84X B #81	F	F	F	F	F	No sdY	No sdY	No sdY	XX
84X B #86	F	F	F	F	F	No sdY	No sdY	No sdY	XX
84X B #87	F	F	F	F	F	No sdY	No sdY	No sdY	XX
84X B #92	F	F	F	F	F	No sdY	No sdY	No sdY	XX
84X B #2	F	F	F	F	F	No sdY	No sdY	No sdY	XX
84X B #5	F	F	F	F	F	No sdY	No sdY	No sdY	XX
84X B #90	F	F	F	F	F	No sdY	No sdY	No sdY	XX
84X B #71	F	F	F	F	M	G/A	T/C	A/T	(3)
84X B #68	F	F	F	F	M	G/A	T/C	failed	(3)
84X B #49	M	M	M	M	M	G/A	T/C	A/T	XY+
84X B #50	M	M	M	M	M	G/A	T/C	A/T	XY+
84X B #55	M	BL	M	M	M	G/A	T/C	A/T	XY+
84X B #57	M	M	M	M	M	G/A	T/C	A/T	XY+
84X B #61	M	M	M	M	M	G/A	T/C	A/T	XY+
84X B #65	M	M	M	M	M	G/A	T/C	A/T	XY+
84X B #70	M	M	M	M	M	failed	failed	A/T	XY+
84X B #83	M	BL	M	M	M	G/A	T/C	A/T	XY+
84X B #85	M	M	M	M	M	G/A	T/C	A/T	XY+
84X B #88	M	M	M	M	M	G/A	T/C	A/T	XY+
84X B #91	M	M	M	M	M	G/A	T/C	A/T	XY+
84X B #45	M	M	M	M	M	G/A	T/C	A/T	XY+
84X B #48	M	M	M	M	M	G/A	T/C	A/T	XY+
84X B #52	M	M	M	M	M	G/A	T/C	A/T	XY+
84X B #58	M	M	M	M	M	G/A	T/C	A/T	XY+
84X B #59	M	M	M	M	M	G/A	T/C	A/T	XY+
84X B #62	M	M	M	M	M	G/A	T/C	A/T	XY+
84X B #63	M	M	M	M	M	G/A	T/C	A/T	XY+
84X B #64	M	M	M	M	M	G/A	T/C	A/T	XY+
84X B #69	M	M	M	M	M	G/A	T/C	A/T	XY+
84X B #77	M	M	M	M	M	G/A	T/C	A/T	XY+
84X B #82	M	BL	M	M	M	G/A	T/C	A/T	XY+
84X B #89	M	M	M	M	M	G/A	T/C	A/T	XY+
84X B #4	M	BL	M	M	M	G/A	T/C	A/T	XY+

## Sheet: XY family 126xD
XY female x XY male
(1) Data collected from Williamson and May 2005
(2) deduced from the observed genotypes of the offspring (a Y-Y- female cannot produce XX females)
(3) outliers not fiting with the model. Potentially sex phenotyping errors, human errors during genotyping or PCR contaminations
	Pheno.	Genotypic	Genotypic	Genotypic	Genotypic	"Apparent"	"Apparent"	"Apparent"	Sex
Fish ID	Sex	Sex	Sex	Sex	Sex	SNP	SNP	SNP	Genotype
(1)	(1)	OtY1 (1)	GH-pseudo (1)	OtY2 (1)	sdY	Exon 2	Intron 2	Exon 3
Female #126					M	G	C	failed	XY- (2)
Male D					M	G/A	T/C	failed	XY+ or Y-Y+
126XD #16	F	F	F	failed	F	No sdY	No sdY	No sdY	XX
126XD #18	F	F	F	F	F	No sdY	No sdY	No sdY	XX
126XD #36	F	F	F	F	F	No sdY	No sdY	No sdY	XX
126XD #69	F	F	F	F	F	No sdY	No sdY	No sdY	XX
126XD #86	F	F	F	F	F	No sdY	No sdY	No sdY	XX
126XD #15	F	F	F	F	F	No sdY	No sdY	No sdY	XX
126XD #29	F	F	F	F	F	No sdY	No sdY	No sdY	XX
126XD #35	F	F	F	F	F	No sdY	No sdY	No sdY	XX
126XD #42	F	F	F	F	F	No sdY	No sdY	No sdY	XX
126XD #51	F	F	F	F	F	No sdY	No sdY	No sdY	XX
126XD #37	F	M	M	M	M	G	C	A	XY- or Y-Y-
126XD #84	F	F	F	M	M	G	C	A	XY- or Y-Y-
126XD #14	F	M	M	M	M	G	C	A	XY- or Y-Y-
126XD #21	F	BL	M	M	M	G	C	A	XY- or Y-Y-
126XD #22	F	BL	M	M	M	G	C	A	XY- or Y-Y-
126XD #23	F	BL	M	M	M	G	C	A	XY- or Y-Y-
126XD #24	F	BL	M	M	M	G	C	A	XY- or Y-Y-
126XD #25	F	BL	M	M	M	G	C	A	XY- or Y-Y-
126XD #26	F	BL	M	M	M	G	C	A	XY- or Y-Y-
126XD #38	F	BL	M	M	M	G	C	A	XY- or Y-Y-
126XD #40	F	M	M	M	M	G	C	A	XY- or Y-Y-
126XD #49	F	BL	M	M	M	G	C	A	XY- or Y-Y-
126XD #50	F	M	M	M	M	G	C	A	XY- or Y-Y-
126XD #43	F	M	M	M	M	G/A	T/C	A/T	(3)
126XD #44	M	BL	M	M	M	G	C	A	(3)
126XD #48	M	BL	M	M	M	failed	failed	A/T	XY+ or Y-Y+
126XD #19	M	M	M	M	M	G/A	T/C	A/T	XY+ or Y-Y+
126XD #30	M	M	M	M	M	G/A	T/C	A/T	XY+ or Y-Y+
126XD #52	M	M	M	M	M	G/A	T/C	A/T	XY+ or Y-Y+
126XD #55	M	M	M	M	M	G/A	T/C	A/T	XY+ or Y-Y+
126XD #64	M	M	M	M	M	G/A	T/C	A/T	XY+ or Y-Y+
126XD #70	M	M	M	M	M	G/A	T/C	A/T	XY+ or Y-Y+
126XD #74	M	M	M	M	M	G/A	T/C	A/T	XY+ or Y-Y+
126XD #87	M	M	M	M	M	G/A	T/C	A/T	XY+ or Y-Y+
126XD #4	M	M	M	M	M	G/A	T/C	A/T	XY+ or Y-Y+
126XD #20	M	M	M	M	M	G/A	T/C	A/T	XY+ or Y-Y+
126XD #27	M	M	M	M	M	G/A	T/C	A/T	XY+ or Y-Y+
126XD #28	M	M	M	M	M	G/A	T/C	A/T	XY+ or Y-Y+
126XD #31	M	BL	M	M	M	G/A	T/C	A/T	XY+ or Y-Y+
126XD #32	M	BL	M	M	M	G/A	T/C	A/T	XY+ or Y-Y+
126XD #33	M	BL	M	M	M	G/A	T/C	A/T	XY+ or Y-Y+
126XD #34	M	BL	M	M	M	G/A	T/C	A/T	XY+ or Y-Y+
126XD #39	M	BL	M	M	M	G/A	T/C	A/T	XY+ or Y-Y+
126XD #41	M	M	M	M	M	G/A	T/C	A/T	XY+ or Y-Y+
126XD #45	M	M	M	M	M	G/A	T/C	A/T	XY+ or Y-Y+
126XD #46	M	M	M	M	M	G/A	T/C	A/T	XY+ or Y-Y+
126XD #47	M	M	M	M	M	G/A	T/C	A/T	XY+ or Y-Y+
126XD #57	M	M	M	M	M	G/A	T/C	A/T	XY+ or Y-Y+

## Sheet: XY family 118xC
XY female x XY male
(1) Data collected from Williamson and May 2005
(2) deduced from the observed genotypes of the offspring (a Y-Y- female cannot produce XX females)
(3) outliers not fiting with the model. Potentially sex phenotyping errors, human errors during genotyping or PCR contaminations
	Pheno.	Genotypic	Genotypic	Genotypic	Genotypic	"Apparent"	"Apparent"	"Apparent"	Sex
Fish ID	Sex	Sex	Sex	Sex	Sex	SNP	SNP	SNP	Genotype
(1)	(1)	OtY1 (1)	GH-pseudo (1)	OtY2 (1)	sdY	Exon 2	Intron 2	Exon 3
Female #118	F				M	G	C	failed	XY- (2)
Male C	M				M	G/A	T/C	failed	XY+ or Y-Y+
118xC #14	F	F	F	F	F	No sdY	No sdY	No sdY	XX
118xC #25	F	F	F	F	F	No sdY	No sdY	No sdY	XX
118xC #49	F	F	F	F	F	No sdY	No sdY	No sdY	XX
118xC #62	F	F	F	F	F	No sdY	No sdY	No sdY	XX
118xC #36	F	F	F	F	F	No sdY	No sdY	No sdY	XX
118xC #48	F	F	F	F	F	No sdY	No sdY	No sdY	XX
118xC #71	F	F	F	F	F	No sdY	No sdY	No sdY	XX
118xC #93	F	F	F	F	F	No sdY	No sdY	No sdY	XX
118xC #17	F	BL	M	M	M	G	C	A	XY- or Y-Y-
118xC #75	F	M	M	M	M	G	C	A	XY- or Y-Y-
118xC #22	F	BL	M	M	M	G	C	A	XY- or Y-Y-
118xC #26	F	BL	M	M	M	G	C	A	XY- or Y-Y-
118xC #35	F	BL	M	M	M	G	C	A	XY- or Y-Y-
118xC #84	F	M	M	M	M	failed	failed	A/T	(3)
118xC #92	F	F	F	F	M	failed	failed	A/T	(3)
118xC #19	F	F	F	F	M	G/A	T/C	A/T	(3)
118xC #15	M	BL	M	M	M	G/A	T/C	A/T	XY+ or Y-Y+
118xC #27	M	M	M	M	M	G/A	T/C	A/T	XY+ or Y-Y+
118xC #32	M	M	M	M	M	G/A	T/C	A/T	XY+ or Y-Y+
118xC #38	M	M	M	M	M	G/A	T/C	A/T	XY+ or Y-Y+
118xC #57	M	M	M	M	M	G/A	T/C	A/T	XY+ or Y-Y+
118xC #61	M	M	M	M	M	G/A	T/C	A/T	XY+ or Y-Y+
118xC #63	M	M	M	M	M	G/A	T/C	A/T	XY+ or Y-Y+
118xC #78	M	M	M	M	M	failed	failed	A/T	XY+ or Y-Y+
118xC #16	M	M	M	M	M	G/A	T/C	A/T	XY+ or Y-Y+
118xC #18	M	BL	M	M	M	G/A	T/C	A/T	XY+ or Y-Y+
118xC #20	M	M	M	M	M	G/A	T/C	A/T	XY+ or Y-Y+
118xC #21	M	M	M	M	M	G/A	T/C	A/T	XY+ or Y-Y+
118xC #23	M	BL	M	M	M	G/A	T/C	A/T	XY+ or Y-Y+
118xC #24	M	M	M	M	M	G/A	T/C	A/T	XY+ or Y-Y+
118xC #28	M	BL	M	M	M	G/A	T/C	A/T	XY+ or Y-Y+
118xC #29	M	BL	M	M	M	G/A	T/C	A/T	XY+ or Y-Y+
118xC #30	M	BL	M	M	M	G/A	T/C	A/T	XY+ or Y-Y+
118xC #31	M	M	M	M	M	G/A	T/C	A/T	XY+ or Y-Y+
118xC #33	M	BL	M	M	M	failed	failed	A/T	XY+ or Y-Y+
118xC #34	M	BL	M	M	M	G/A	T/C	A/T	XY+ or Y-Y+
118xC #37	M	M	M	M	M	G/A	T/C	A/T	XY+ or Y-Y+
118xC #39	M	M	M	M	M	G/A	T/C	A/T	XY+ or Y-Y+
118xC #40	M	M	M	M	M	G/A	T/C	A/T	XY+ or Y-Y+
118xC #41	M	M	M	M	M	G/A	T/C	A/T	XY+ or Y-Y+
118xC #42	M	M	M	M	M	G/A	T/C	A/T	XY+ or Y-Y+
118xC #66	M	M	M	M	M	failed	failed	A/T	XY+ or Y-Y+
118xC #67	M	M	M	M	M	G/A	T/C	A/T	XY+ or Y-Y+
118xC #73	M	M	M	M	M	failed	failed	A/T	XY+ or Y-Y+
118xC #81	M	BL	M	M	M	failed	failed	A/T	XY+ or Y-Y+
118xC #83	M	M	M	M	M	failed	failed	A/T	XY+ or Y-Y+
118xC #88	M	M	M	M	M	failed	failed	A/T	XY+ or Y-Y+
118xC #90	M	M	M	M	M	failed	failed	A/T	XY+ or Y-Y+
